# Supplementary material for: Transcriptome of human foetal heart compared with cardiomyocytes from pluripotent stem cells
Source: Oxford University Press journal article supplement (doi:10.1242/dev.123810), 2015-01-01
Supplement: dev123810supp.pdf [file dev123810supp.pdf]

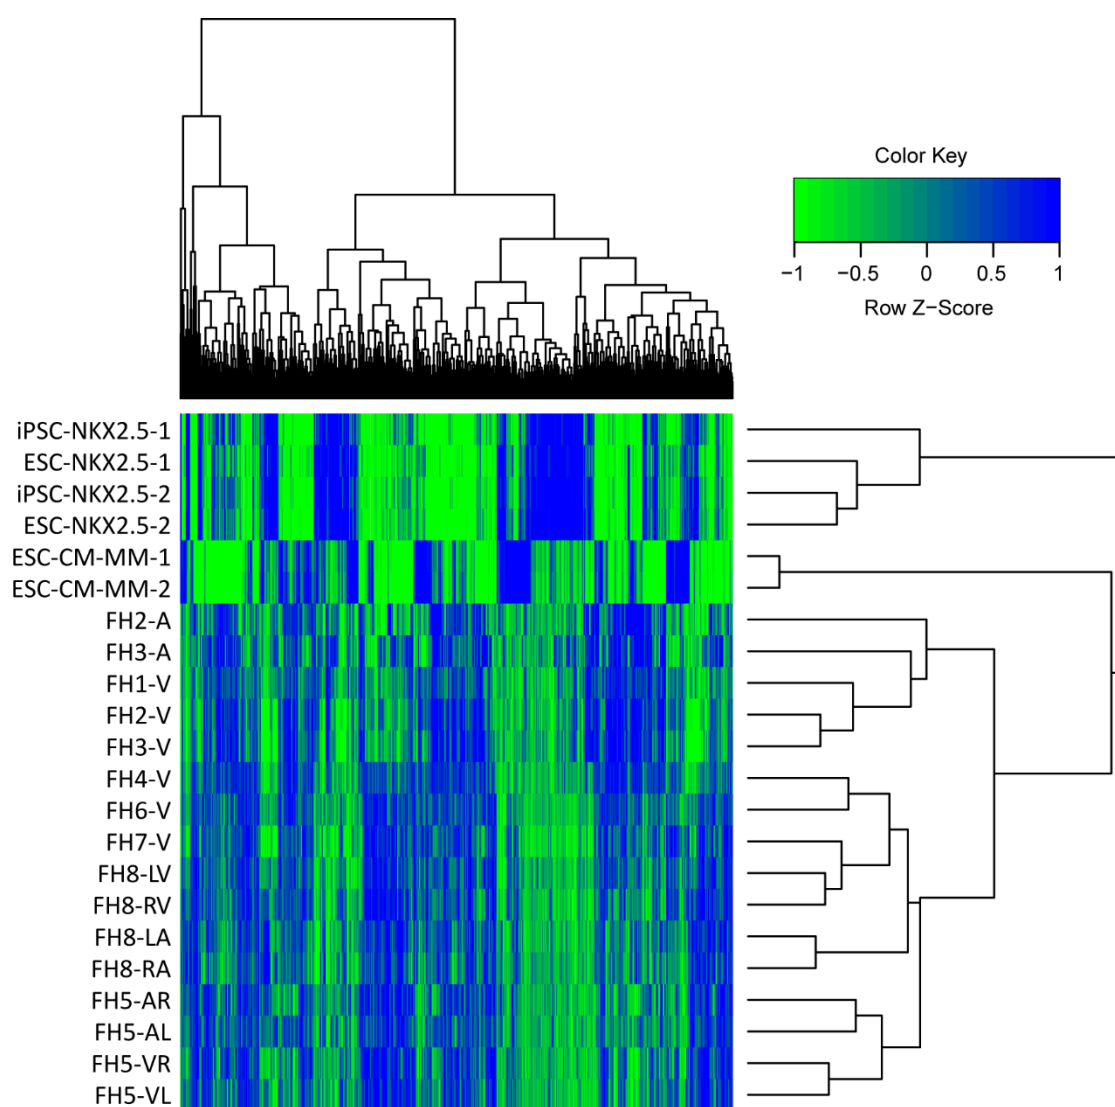

**Figure S1: Hierarchical clustering of differentially expressed genes between foetal heart samples and human pluripotent stem cell derived cardiomyocytes (PSC-CMs).** First trimester and second trimester foetal heart samples are compared with hPSC-CMs in LI-BPEL differentiation medium and maturation medium (MM). The dendograms illustrate closer clustering of the hPSC-CMs in MM with the foetal heart samples than the hiPSC-CMs in LI-BPEL (Fisher's exact test and Benjamini-Hochberg method).

**Table S1: Description of fetal heart and commercial reference samples**

| First trimester |                 |                               |        |
|-----------------|-----------------|-------------------------------|--------|
| Code            | Name            | Age of gestation (weeks.days) | Gender |
| FH1-V           | heart ventricle | 7.2                           | female |
| FH2-V           | heart ventricle | 7.4                           | female |
| FH2-A           | heart atrium    | 7.4                           | female |
| FH3-V           | heart ventricle | 7.4                           | male   |
| FH3-A           | heart atrium    | 7.4                           | male   |
| FH4-V           | heart ventricle | 10.5                          | female |

  

| Second trimester |                       |                               |        |
|------------------|-----------------------|-------------------------------|--------|
| Code             | Name                  | Age of gestation (weeks.days) | Gender |
| FH5-LV           | heart left ventricle  | 15                            | male   |
| FH5-RV           | heart right ventricle | 15                            | male   |
| FH5-LA           | heart left atrium     | 15                            | male   |
| FH5-RA           | heart right atrium    | 15                            | male   |
| FH6-V            | heart ventricle       | 15.3                          | male   |
| FH7-V            | heart ventricle       | 20                            | male   |
| FH8-LV           | heart left ventricle  | 20+                           | female |
| FH8-RV           | heart right ventricle | 20+                           | female |
| FH8-LA           | heart left atrium     | 20+                           | female |
| FH8-RA           | heart right atrium    | 20+                           | female |

  

| Reference samples |                               |                    |        |
|-------------------|-------------------------------|--------------------|--------|
| Code              | Name                          | Age (years)        | Gender |
| AH-pool           | Human Normal Heart Donor Pool | 21, 24, 27, 29, 44 | male   |
| Ref-pool          | Universal Human Reference RNA |                    |        |

## **Table S2.**

[Click here to Download Table S2](#)

## **Table S3.**

[Click here to Download Table S3](#)

## **Table S4.**

[Click here to Download Table S4](#)
